# Supplementary material
Source: publisher figshare collection journal article supplement (https://acs.figshare.com/ndownloader/files/4082896)
Supplement: Supplementary file 1 [file 4082896]

# Supporting Information for

## The Influence of Poly(vinyl phenol) Sublayer on the Crystallization Behavior of Poly(3-hydroxybutyrate) Thin Films

Xiaoli Sun,<sup>†</sup> Zhen Chen,<sup>‡</sup> Feng Wang,<sup>†</sup> Shouke Yan<sup>†\*</sup> and Isao Takahashi<sup>§</sup>

<sup>†</sup> *State Key Laboratory of Chemical Resource Engineering, Beijing University of Chemical Technology, Beijing 100029, China ([skyan@mail.buct.edu.cn](mailto:skyan@mail.buct.edu.cn))*

<sup>‡</sup> *State Key Laboratory of Polymer Physics and Chemistry, Institute of Chemistry, Chinese Academy of Sciences, Beijing 100080, China*

<sup>§</sup> *School of Science and Technology, Kwansei Gakuin University, Sanda 669-1337, Japan.*

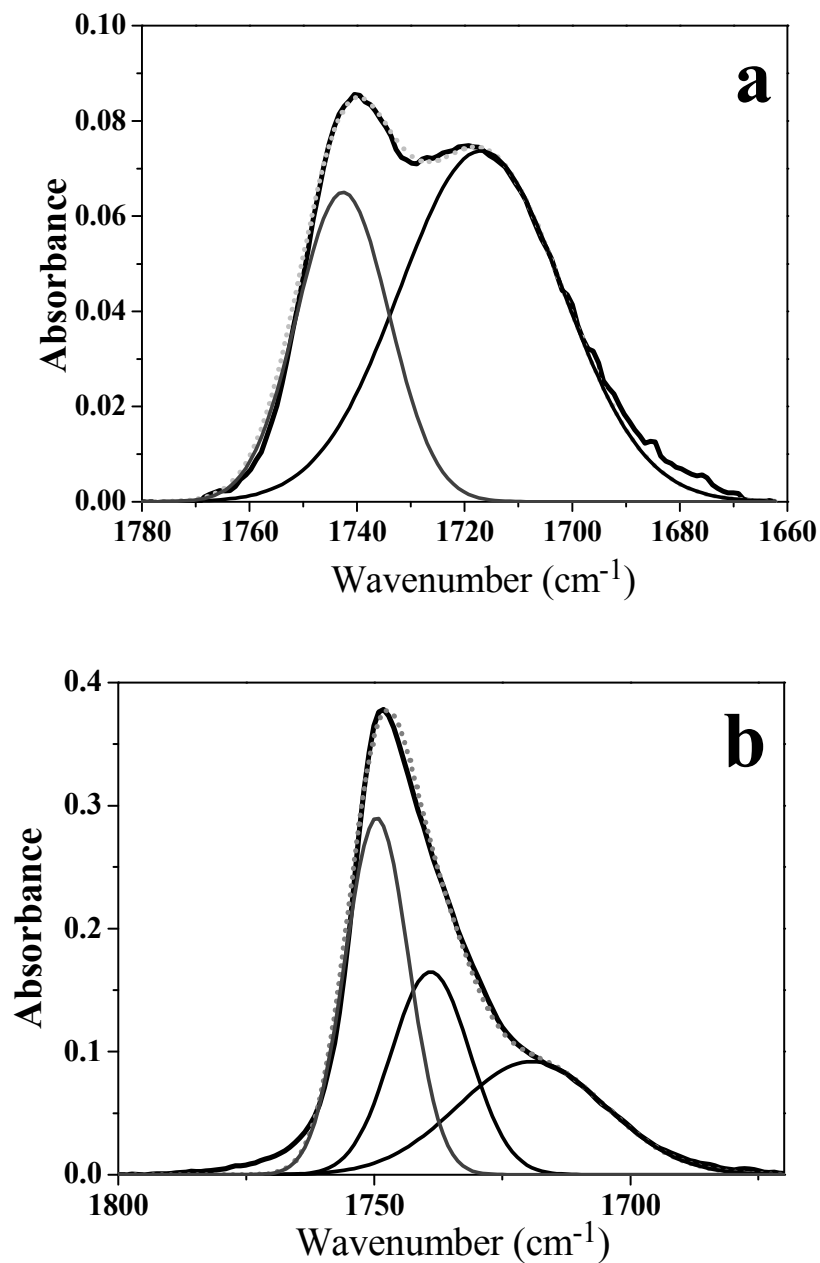

Figure S1 Decomposition of observed FTIR spectra in the C=O stretching region for 40 nm-thick PHB (a) and 185 nm-thick PHB (b) on PVPh substrate (solid line) into first kind of amorphous component of PHB ( $1742 \text{ cm}^{-1}$  for (a);  $1750 \text{ cm}^{-1}$  for (b) ), second kind of amorphous component of PHB( $1737 \text{ cm}^{-1}$  only for (b) ), hydrogen bonded component

(C=O...O-H) between PHB and PVPh( $1715\text{cm}^{-1}$ ). The reconstructed absorbance (dotted line) was obtained by summing up of the absorbance of the elemental bands.

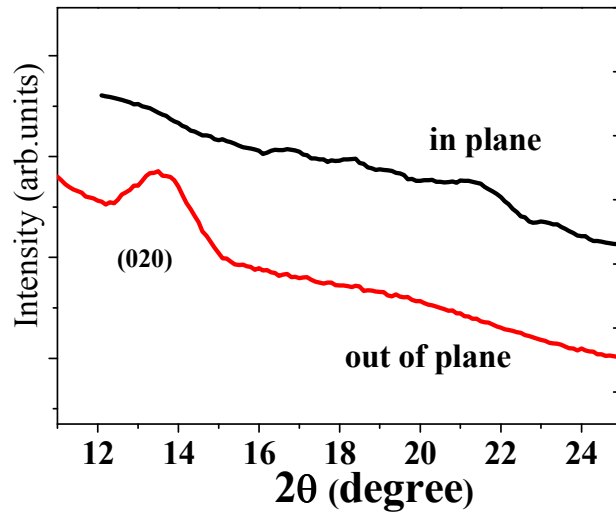

Figure S3 Out-of-plane and in-plane GIXD profiles of 245 nm-thick PHB thin film on PVPh layer melt-recrystallized at 25°C.
